# Supplementary material
Source: Springer Nature journal article supplement (https://www.springermedizin.de/resource/supplementary/12913_2010_1660_MOESM2_ESM.pdf/9528638)
Supplement: MOESM2 [file 9528638]

Costs per outpatient visit in Kshs

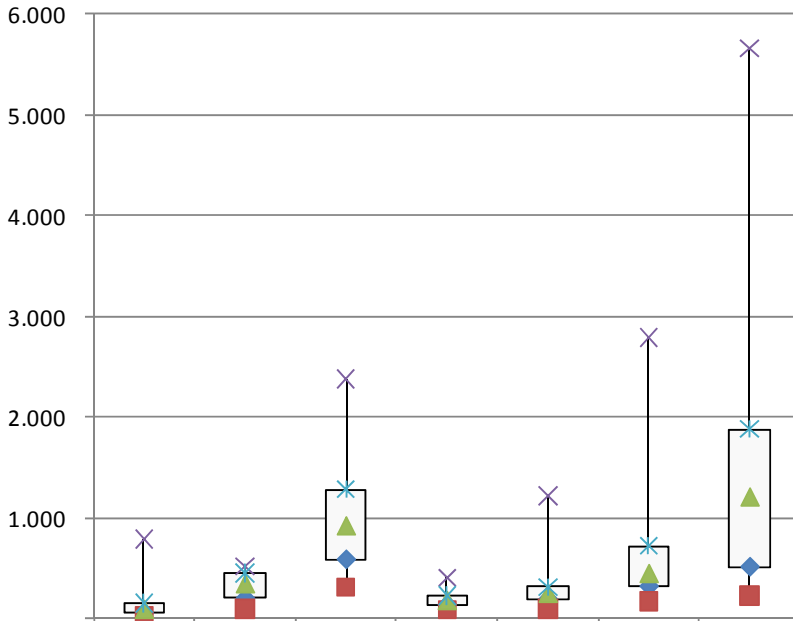

- ◆ First quartile
- Minimum value
- ▲ Median value
- ✕ Maximum value
- ✱ Third quartile
